# Supplementary material for: Quantifying the minimum ensemble size for asymptotic accuracy of the ensemble Kalman filter using the degrees of instability
Source: Copernicus journal article supplement (doi:10.5194/egusphere-2025-5144), 2025-11-12
Supplement: Supplementary file [file egusphere-2025-5144-AC1-supplement.pdf]

# Supplement to Quantifying the minimum ensemble size for asymptotic accuracy of the ensemble Kalman filter using the degrees of instability

Kota Takeda<sup>1,2</sup> and Takemasa Miyoshi<sup>2,3</sup>

<sup>1</sup>Department of Applied Physics, Graduate School of Engineering, Nagoya University, Nagoya, Japan

<sup>2</sup>RIKEN Center for Computational Science, Kobe, Japan

<sup>3</sup>RIKEN Center for Interdisciplinary Theoretical and Mathematical Sciences, Wako, Japan

**Correspondence:** Kota Takeda (takeda@na.nuap.nagoya-u.ac.jp)

## 1 Comparison of error evaluation criteria

Mathematical studies for filters often focus on the long-term behavior of the analysis error (Kelly et al., 2014; Kelly and Stuart, 2019; Takeda and Sakajo, 2024; Biswas and Branicki, 2024; Sanz-Alonso and Waniorek, 2025) and aim to establish the bound known as time-asymptotic filter accuracy, which is defined as Eq. (17) in the manuscript. It aims to bound the expectation of

5 the squared error

$$\text{SE}_n = \mathbb{E}[\|\mathbf{x}_n - \bar{\mathbf{x}}_n^a\|^2].$$

Here, we compare this criterion with the commonly used RMSE. The expectation of RMSE at time  $t_n$  is defined as

$$\text{RMSE}_n = \mathbb{E} \left[ \frac{\|\mathbf{x}_n - \bar{\mathbf{x}}_n^a\|}{\sqrt{N_x}} \right]. \quad (1)$$

From Jensen's convex inequality, we have

$$10 \quad N_x \text{RMSE}_n^2 = \mathbb{E}[\|\mathbf{x}_n - \bar{\mathbf{x}}_n^a\|^2] \leq \mathbb{E}[\|\mathbf{x}_n - \bar{\mathbf{x}}_n^a\|^2] = \text{SE}_n. \quad (2)$$

This implies that small values of the expectation of the squared error lead to small RMSE values in expectation, but not vice versa. In addition, supremum over time in the asymptotic limit is larger than or equal to the time-averaged value in general. Hence, the criterion Eq. (17) is stronger than the time-averaged RMSE criterion.

## References

- 15 Biswas, A. and Branicki, M.: A Unified Framework for the Analysis of Accuracy and Stability of a Class of Approximate Gaussian Filters for the Navier–Stokes Equations, *Nonlinearity*, 37, 125 013, <https://doi.org/10.1088/1361-6544/ad805b>, 2024.
- Kelly, D. and Stuart, A. M.: Ergodicity and Accuracy of Optimal Particle Filters for Bayesian Data Assimilation, *Chin. Ann. Math. Ser. B*, 40, 811–842, <https://doi.org/10.1007/s11401-019-0161-5>, 2019.
- Kelly, D. T. B., Law, K. J. H., and Stuart, A. M.: Well-Posedness and Accuracy of the Ensemble Kalman Filter in Discrete and Continuous  
20 Time, *Nonlinearity*, 27, 2579–2603, <https://doi.org/10.1088/0951-7715/27/10/2579>, 2014.
- Sanz-Alonso, D. and Waniorek, N.: Long-Time Accuracy of Ensemble Kalman Filters for Chaotic Dynamical Systems and Machine-Learned Dynamical Systems, *SIAM J. Appl. Dyn. Syst.*, pp. 2246–2286, <https://doi.org/10.1137/24M1719232>, 2025.
- Takeda, K. and Sakajo, T.: Uniform Error Bounds of the Ensemble Transform Kalman Filter for Chaotic Dynamics with Multiplicative Covariance Inflation, *SIAM/ASA J. Uncertainty Quantification*, 12, 1315–1335, <https://doi.org/10.1137/24M1637192>, 2024.
